# Supplementary material for: Evaluation of Chemical Compositions and the Antioxidant and Cytotoxic Properties of the Aqueous Extract of Tri-Yannarose Recipe (Areca catechu, Azadirachta indica, and Tinospora crispa)
Source: MDPI journal article supplement (doi:10.3390/antiox12071428), 2023-07-15
Supplement: s1 [file s1]

## Supplementary material

**Table S1.** The mass spectra of compound identification of Tri-Yannarose recipe's aqueous extract identified via LC-QTOF-MS in the positive and negative mode based on the match scores obtained during the library search.

| No. | Polarity | Name of compound identification | Mass spectra                                                                                                                                                                                                                                            |
|-----|----------|---------------------------------|---------------------------------------------------------------------------------------------------------------------------------------------------------------------------------------------------------------------------------------------------------|
| 1   | Positive | 13E-Docosenamide                | <p>MS Zoomed Spectrum</p> <p>Cpd 181: 13E-Docosenamide; C22 H43 N O; 22.067; +ESI Scan (rt: 21.917, 22.017, 22.117 min, 3</p> <p>MSMS Spectrum</p> <p>Cpd 181: 13E-Docosenamide; C22 H43 N O; 22.067; (M+H)+; +ESI Product Ion (rt: 21.958, 22.058,</p> |

| No. | Polarity | Name of compound identification | Mass spectra                                                                                                                                                                                                                                                                                                                                      |
|-----|----------|---------------------------------|---------------------------------------------------------------------------------------------------------------------------------------------------------------------------------------------------------------------------------------------------------------------------------------------------------------------------------------------------|
|     |          |                                 | 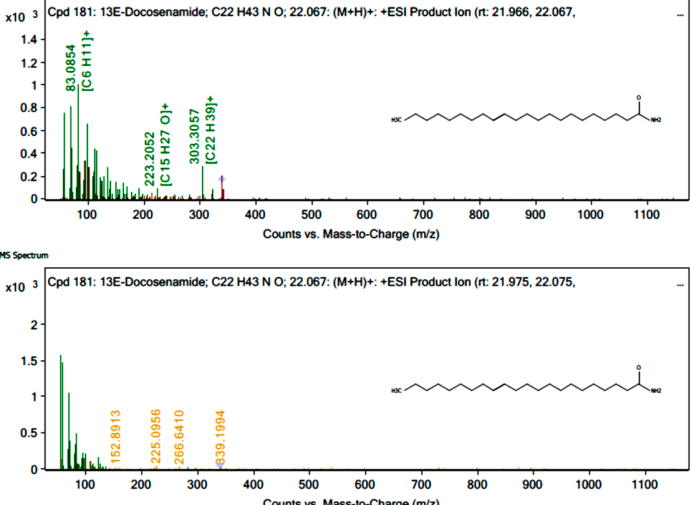 <p>Cpd 181: 13E-Docosenamide; C22 H43 N O; 22.067: (M+H)+; +ESI Product Ion (rt: 21.966, 22.067, ...)</p> <p>MS/MS Spectrum</p> <p>Cpd 181: 13E-Docosenamide; C22 H43 N O; 22.067: (M+H)+; +ESI Product Ion (rt: 21.975, 22.075, ...)</p>                     |
| 2   |          | Choline                         |  <p>MS Zoomed Spectrum</p> <p>Cpd 15: Choline; C5 H14 N O; 1.859: +ESI Scan (rt: 1.772, 1.872 min, 2 scans) Frag=175.0V 2_01</p> <p>MS/MS Spectrum</p> <p>Cpd 15: Choline; C5 H14 N O; 1.859: M+; +ESI Product Ion (rt: 1.788, 1.913 min, 2 scans) Frag=18</p> |

| No. | Polarity | Name of compound identification | Mass spectra                                                                                                                                                                                                                                                                                                                                                                                                                                                                                                                                                                                                                                           |
|-----|----------|---------------------------------|--------------------------------------------------------------------------------------------------------------------------------------------------------------------------------------------------------------------------------------------------------------------------------------------------------------------------------------------------------------------------------------------------------------------------------------------------------------------------------------------------------------------------------------------------------------------------------------------------------------------------------------------------------|
|     |          |                                 | 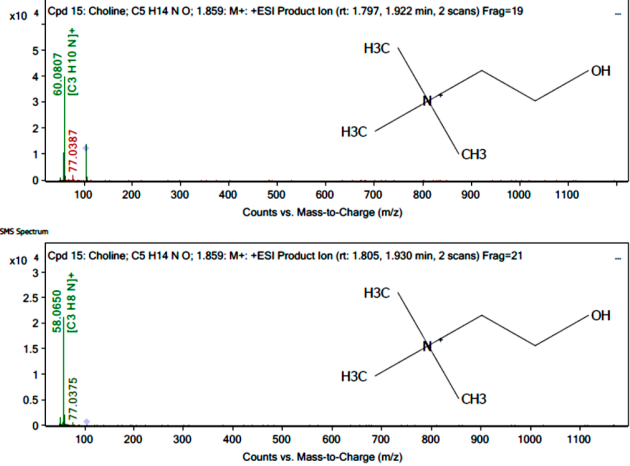 <p>Top Spectrum: Cpd 15: Choline; C5 H14 N O; 1.859: M<sup>+</sup>; +ESI Product Ion (rt: 1.797, 1.922 min, 2 scans) Frag=19. Base peak at m/z 60.0807 [C3 H10 N]<sup>+</sup>. Chemical structure: (CH<sub>3</sub>)<sub>3</sub>N<sup>+</sup>CH<sub>2</sub>CH<sub>2</sub>OH.</p> <p>Bottom Spectrum: Cpd 15: Choline; C5 H14 N O; 1.859: M<sup>+</sup>; +ESI Product Ion (rt: 1.805, 1.930 min, 2 scans) Frag=21. Base peak at m/z 60.0807 [C3 H10 N]<sup>+</sup>. Chemical structure: (CH<sub>3</sub>)<sub>3</sub>N<sup>+</sup>CH<sub>2</sub>CH<sub>2</sub>OH.</p> |
| 3   |          | Guanine                         |  <p>Top Spectrum: Cpd 23: Guanine; C5 H5 N5 O; 2.298: +ESI Scan (rt: 2.273 min) Frag=175.0V 2_016_65_P1001.d. Base peak at m/z 152.0571. Chemical structure: C5H5N5O.</p> <p>Bottom Spectrum: Cpd 23: Guanine; C5 H5 N5 O; 2.298: (M+H)<sup>+</sup>; +ESI Product Ion (rt: 2.289 min) Frag=185.0V CID. Base peak at m/z 152.0567. Chemical structure: C5H5N5O.</p>                                                                                                                                                                                                  |

| No. | Polarity | Name of compound identification | Mass spectra                                                                                                                                                                                                                                                                                                                                                                  |
|-----|----------|---------------------------------|-------------------------------------------------------------------------------------------------------------------------------------------------------------------------------------------------------------------------------------------------------------------------------------------------------------------------------------------------------------------------------|
|     |          |                                 | 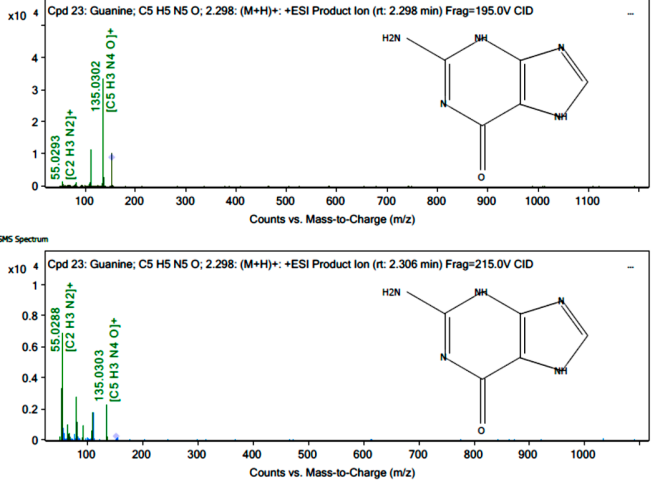 <p>Cpd 23: Guanine; C<sub>5</sub>H<sub>5</sub>N<sub>5</sub>O; 2.298: (M+H)<sup>+</sup>; +ESI Product Ion (rt: 2.298 min) Frag=195.0V CID</p> <p>Cpd 23: Guanine; C<sub>5</sub>H<sub>5</sub>N<sub>5</sub>O; 2.298: (M+H)<sup>+</sup>; +ESI Product Ion (rt: 2.306 min) Frag=215.0V CID</p> |
| 4   |          | Trigonelline                    |  <p>Cpd 17: Trigonelline; C<sub>7</sub>H<sub>8</sub>NO<sub>2</sub>; 1.947: +ESI Scan (rt: 1.872, 1.972 min, 2 scans) Frag=175.0V 2_0</p>                                                                                                                                                  |



| No. | Polarity | Name of compound identification | Mass spectra                                                                                                                                                                                                                                                                                                                                                                                                                                                                                                                                                                                                                                                                                                                                                                                                                                                                                                               |
|-----|----------|---------------------------------|----------------------------------------------------------------------------------------------------------------------------------------------------------------------------------------------------------------------------------------------------------------------------------------------------------------------------------------------------------------------------------------------------------------------------------------------------------------------------------------------------------------------------------------------------------------------------------------------------------------------------------------------------------------------------------------------------------------------------------------------------------------------------------------------------------------------------------------------------------------------------------------------------------------------------|
|     |          |                                 | <p data-bbox="1064 263 1774 284">Cpd 17: Trigonelline; C<sub>7</sub>H<sub>8</sub>NO<sub>2</sub>; 1.947: M<sup>+</sup>: +ESI Product Ion (rt: 1.889, 1.989 min, 2 scans) Frag=</p> 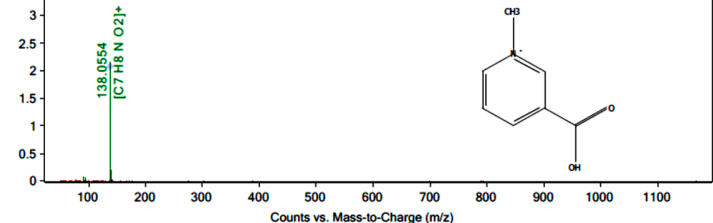 <p data-bbox="1064 518 1108 534">MS/MS Spectrum</p> <p data-bbox="1064 542 1774 563">Cpd 17: Trigonelline; C<sub>7</sub>H<sub>8</sub>NO<sub>2</sub>; 1.947: M<sup>+</sup>: +ESI Product Ion (rt: 1.897, 1.997 min, 2 scans) Frag=</p>  <p data-bbox="1064 798 1108 813">MS/MS Spectrum</p> <p data-bbox="1064 821 1774 842">Cpd 17: Trigonelline; C<sub>7</sub>H<sub>8</sub>NO<sub>2</sub>; 1.947: M<sup>+</sup>: +ESI Product Ion (rt: 1.905, 2.005 min, 2 scans) Frag=</p>  |

| No. | Polarity | Name of compound identification | Mass spectra                                                                                                                                                                                                                                                                                                                                                                                                                                                                                                                                                                                                                                                                                                                                                                                                                                                                                                                                                                                                                                                                                                                                                                                                 |
|-----|----------|---------------------------------|--------------------------------------------------------------------------------------------------------------------------------------------------------------------------------------------------------------------------------------------------------------------------------------------------------------------------------------------------------------------------------------------------------------------------------------------------------------------------------------------------------------------------------------------------------------------------------------------------------------------------------------------------------------------------------------------------------------------------------------------------------------------------------------------------------------------------------------------------------------------------------------------------------------------------------------------------------------------------------------------------------------------------------------------------------------------------------------------------------------------------------------------------------------------------------------------------------------|
| 5   |          | DI-tetrahydropalmatine          | <p>MS Zoomed Spectrum</p> 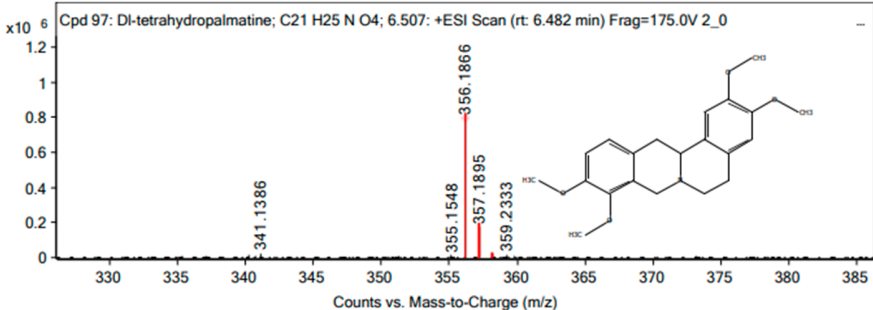 <p>Cpd 97: DI-tetrahydropalmatine; C<sub>21</sub> H<sub>25</sub> N O<sub>4</sub>; 6.507: +ESI Scan (rt: 6.482 min) Frag=175.0V 2_0</p> <p>Counts vs. Mass-to-Charge (m/z)</p> <p>MS/MS Spectrum</p>  <p>Cpd 97: DI-tetrahydropalmatine; C<sub>21</sub> H<sub>25</sub> N O<sub>4</sub>; 6.507: (M+H)<sup>+</sup>: +ESI Product Ion (rt: 6.499 min) Fr</p> <p>Counts vs. Mass-to-Charge (m/z)</p> <p>MS/MS Spectrum</p>  <p>Cpd 97: DI-tetrahydropalmatine; C<sub>21</sub> H<sub>25</sub> N O<sub>4</sub>; 6.507: (M+H)<sup>+</sup>: +ESI Product Ion (rt: 6.507 min) Fr</p> <p>Counts vs. Mass-to-Charge (m/z)</p> <p>MS/MS Spectrum</p>  <p>Cpd 97: DI-tetrahydropalmatine; C<sub>21</sub> H<sub>25</sub> N O<sub>4</sub>; 6.507: (M+H)<sup>+</sup>: +ESI Product Ion (rt: 6.515 min) Fr</p> <p>Counts vs. Mass-to-Charge (m/z)</p> |

| No. | Polarity | Name of compound identification | Mass spectra                                                                                                                                                                                                                                                                                                                                                                                                                                                                                                                                                                                                                                                                                                                                                                                                                                                                                                                                                                                                                             |
|-----|----------|---------------------------------|------------------------------------------------------------------------------------------------------------------------------------------------------------------------------------------------------------------------------------------------------------------------------------------------------------------------------------------------------------------------------------------------------------------------------------------------------------------------------------------------------------------------------------------------------------------------------------------------------------------------------------------------------------------------------------------------------------------------------------------------------------------------------------------------------------------------------------------------------------------------------------------------------------------------------------------------------------------------------------------------------------------------------------------|
| 6   |          | Phytosphingosine                | <p>MS Zoomed Spectrum</p> 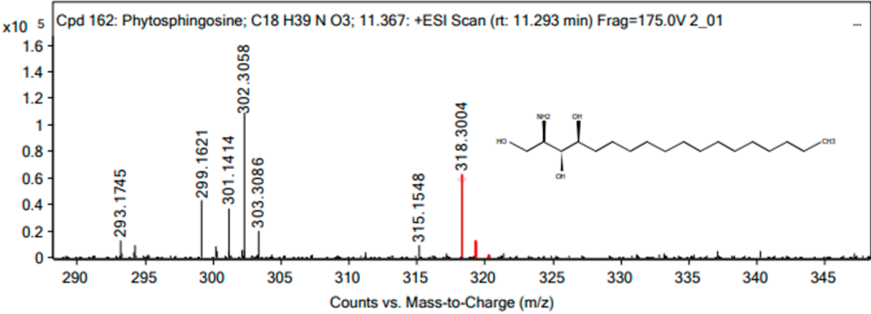 <p>Cpd 162: Phytosphingosine; C<sub>18</sub> H<sub>39</sub> N O<sub>3</sub>; 11.367: +ESI Scan (rt: 11.293 min) Frag=175.0V 2_01</p> <p>MS/MS Spectrum</p>  <p>Cpd 162: Phytosphingosine; C<sub>18</sub> H<sub>39</sub> N O<sub>3</sub>; 11.367: (M+H)<sup>+</sup>; +ESI Product Ion (rt: 11.359 min) Fra</p> <p>MS/MS Spectrum</p>  <p>Cpd 162: Phytosphingosine; C<sub>18</sub> H<sub>39</sub> N O<sub>3</sub>; 11.367: (M+H)<sup>+</sup>; +ESI Product Ion (rt: 11.367 min) Fra</p> <p>MS/MS Spectrum</p>  <p>Cpd 162: Phytosphingosine; C<sub>18</sub> H<sub>39</sub> N O<sub>3</sub>; 11.367: (M+H)<sup>+</sup>; +ESI Product Ion (rt: 11.376 min) Fra</p> |

| No. | Polarity | Name of compound identification | Mass spectra                                                                                                                                                                                                                                                                                                                                                                                                                                                                                                                                                                                                                                                                                                                                                                                                                                                                                                                                                                                                                                                                                                        |
|-----|----------|---------------------------------|---------------------------------------------------------------------------------------------------------------------------------------------------------------------------------------------------------------------------------------------------------------------------------------------------------------------------------------------------------------------------------------------------------------------------------------------------------------------------------------------------------------------------------------------------------------------------------------------------------------------------------------------------------------------------------------------------------------------------------------------------------------------------------------------------------------------------------------------------------------------------------------------------------------------------------------------------------------------------------------------------------------------------------------------------------------------------------------------------------------------|
| 7   |          | 4-Hydroxycoumarin               | <p data-bbox="884 263 1758 295">Cpd 62: 4-Hydroxycoumarin; C<sub>9</sub> H<sub>6</sub> O<sub>3</sub>; 4.590: +ESI Scan (rt: 4.478, 4.578 min, 2 scans) Frag=175</p> 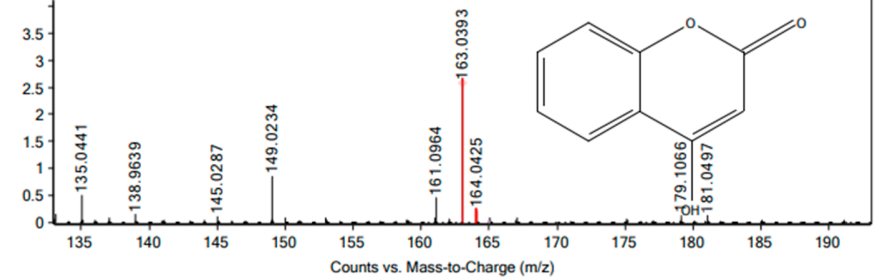 <p data-bbox="1064 582 1736 614">MS/MS Spectrum<br/>Cpd 62: 4-Hydroxycoumarin; C<sub>9</sub> H<sub>6</sub> O<sub>3</sub>; 4.590: (M+H)<sup>+</sup>; +ESI Product Ion (rt: 4.519, 4.644 min, 2 s)</p>  <p data-bbox="1064 853 1736 885">MS/MS Spectrum<br/>Cpd 62: 4-Hydroxycoumarin; C<sub>9</sub> H<sub>6</sub> O<sub>3</sub>; 4.590: (M+H)<sup>+</sup>; +ESI Product Ion (rt: 4.528, 4.653 min, 2 s)</p>  <p data-bbox="1064 1117 1736 1149">Cpd 62: 4-Hydroxycoumarin; C<sub>9</sub> H<sub>6</sub> O<sub>3</sub>; 4.590: (M+H)<sup>+</sup>; +ESI Product Ion (rt: 4.536, 4.661 min, 2 s)</p>  |

| No. | Polarity | Name of compound identification | Mass spectra                                                                                                                                                                                                                                                                                                                                                                                                                                                                                                                                                                                                                                                                                                                                                                                                                                                                                                                                                                                                                     |
|-----|----------|---------------------------------|----------------------------------------------------------------------------------------------------------------------------------------------------------------------------------------------------------------------------------------------------------------------------------------------------------------------------------------------------------------------------------------------------------------------------------------------------------------------------------------------------------------------------------------------------------------------------------------------------------------------------------------------------------------------------------------------------------------------------------------------------------------------------------------------------------------------------------------------------------------------------------------------------------------------------------------------------------------------------------------------------------------------------------|
| 8   |          | Marmesin                        | <p>MS Zoomed Spectrum</p> <p>Cpd 148: Marmesin; C14 H14 O4; 9.764: +ESI Scan (rt: 9.689, 9.790 min, 2 scans) Frag=175.0V 2</p> 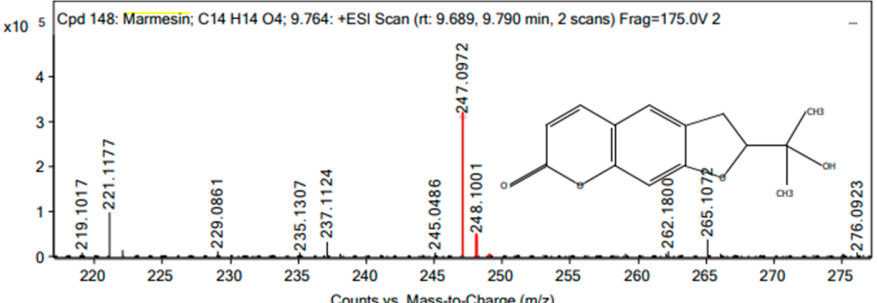 <p>Counts vs. Mass-to-Charge (m/z)</p> <p>MS/MS Spectrum</p> <p>Cpd 148: Marmesin; C14 H14 O4; 9.764: (M+H)+: +ESI Product Ion (rt: 9.706, 9.806 min, 2 scans)</p>  <p>Counts vs. Mass-to-Charge (m/z)</p> <p>MS/MS Spectrum</p> <p>Cpd 148: Marmesin; C14 H14 O4; 9.764: (M+H)+: +ESI Product Ion (rt: 9.714, 9.814 min, 2 scans)</p>  <p>Counts vs. Mass-to-Charge (m/z)</p> <p>MS/MS Spectrum</p> <p>Cpd 148: Marmesin; C14 H14 O4; 9.764: (M+H)+: +ESI Product Ion (rt: 9.723, 9.823 min, 2 scans)</p>  <p>Counts vs. Mass-to-Charge (m/z)</p> |

| No. | Polarity | Name of compound identification | Mass spectra                                                                                                                                                                                                                                                                                                                                                                                                                                                                                                                                                                                                                                                                                                                                                                                                                                                                                                                                                                                                                                                                      |
|-----|----------|---------------------------------|-----------------------------------------------------------------------------------------------------------------------------------------------------------------------------------------------------------------------------------------------------------------------------------------------------------------------------------------------------------------------------------------------------------------------------------------------------------------------------------------------------------------------------------------------------------------------------------------------------------------------------------------------------------------------------------------------------------------------------------------------------------------------------------------------------------------------------------------------------------------------------------------------------------------------------------------------------------------------------------------------------------------------------------------------------------------------------------|
| 1   | Negative | Succinic acid                   | <p>MS Zoomed Spectrum</p> <p>Cpd 19: Succinic acid; C4 H6 O4; 2.695: -ESI Scan (rt: 2.570, 2.670, 2.770 min, 3 scans) Frag=175</p> 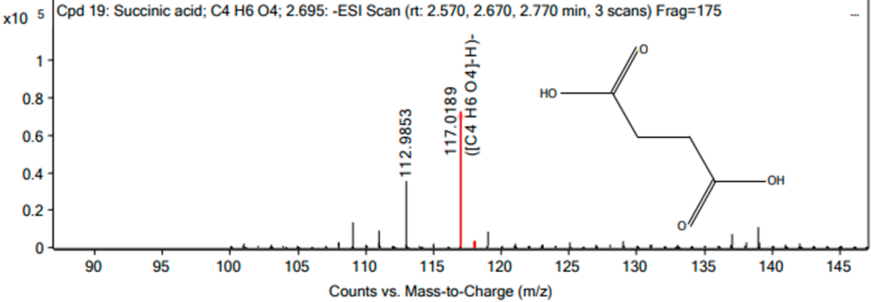 <p>Counts vs. Mass-to-Charge (m/z)</p> <p>MSMS Spectrum</p> <p>Cpd 19: Succinic acid; C4 H6 O4; 2.695: (M-H)<sup>-</sup> -ESI Product Ion (rt: 2.586, 2.687, 2.787 min, 3 sc)</p>  <p>Counts vs. Mass-to-Charge (m/z)</p> <p>MSMS Spectrum</p> <p>Cpd 19: Succinic acid; C4 H6 O4; 2.695: (M-H)<sup>-</sup> -ESI Product Ion (rt: 2.595, 2.695, 2.795 min, 3 sc)</p>  <p>Counts vs. Mass-to-Charge (m/z)</p> <p>MSMS Spectrum</p> <p>Cpd 19: Succinic acid; C4 H6 O4; 2.695: (M-H)<sup>-</sup> -ESI Product Ion (rt: 2.603, 2.703, 2.803 min, 3 sc)</p>  <p>Counts vs. Mass-to-Charge (m/z)</p> |

| No. | Polarity | Name of compound identification     | Mass spectra                                                                                                                                                                                                                                                                                                                                                                                                                                                                                                                                                                                                                                                                                                                                                                                                                                                                                                                                                                                                                                                                                                                                                                                                                                                                             |
|-----|----------|-------------------------------------|------------------------------------------------------------------------------------------------------------------------------------------------------------------------------------------------------------------------------------------------------------------------------------------------------------------------------------------------------------------------------------------------------------------------------------------------------------------------------------------------------------------------------------------------------------------------------------------------------------------------------------------------------------------------------------------------------------------------------------------------------------------------------------------------------------------------------------------------------------------------------------------------------------------------------------------------------------------------------------------------------------------------------------------------------------------------------------------------------------------------------------------------------------------------------------------------------------------------------------------------------------------------------------------|
| 2   |          | L- $\alpha$ -Hydroxyisovaleric acid | <p>MS Zoomed Spectrum</p> 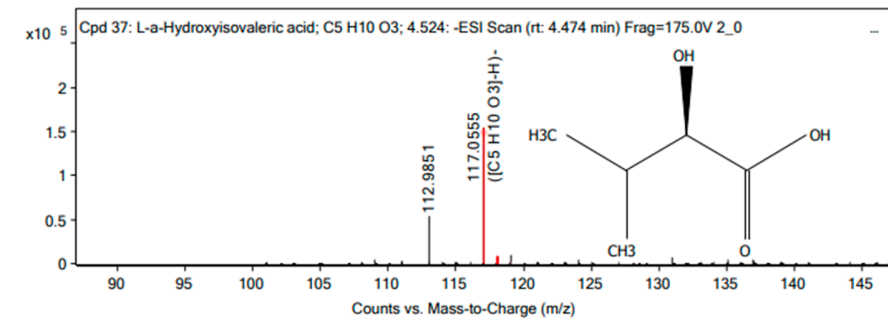 <p>Cpd 37: L-<math>\alpha</math>-Hydroxyisovaleric acid; C<sub>5</sub> H<sub>10</sub> O<sub>3</sub>; 4.524: -ESI Scan (rt: 4.474 min) Frag=175.0V 2_0</p> <p>Counts vs. Mass-to-Charge (m/z)</p> <p>MS/MS Spectrum</p>  <p>Cpd 37: L-<math>\alpha</math>-Hydroxyisovaleric acid; C<sub>5</sub> H<sub>10</sub> O<sub>3</sub>; 4.524: (M-H)<sup>-</sup> -ESI Product Ion (rt: 4.516 min) Fra</p> <p>Counts vs. Mass-to-Charge (m/z)</p> <p>MS/MS Spectrum</p>  <p>Cpd 37: L-<math>\alpha</math>-Hydroxyisovaleric acid; C<sub>5</sub> H<sub>10</sub> O<sub>3</sub>; 4.524: (M-H)<sup>-</sup> -ESI Product Ion (rt: 4.524 min) Fra</p> <p>Counts vs. Mass-to-Charge (m/z)</p> <p>MS/MS Spectrum</p>  <p>Cpd 37: L-<math>\alpha</math>-Hydroxyisovaleric acid; C<sub>5</sub> H<sub>10</sub> O<sub>3</sub>; 4.524: (M-H)<sup>-</sup> -ESI Product Ion (rt: 4.532 min) Fra</p> <p>Counts vs. Mass-to-Charge (m/z)</p> |

| No. | Polarity | Name of compound identification | Mass spectra                                                                                                                                                                                                                                                                                                                                                                                                                                                                                                                                                                                                                                                                                                                                                                                                                                                                                                                                                                                                                                                                                                                                         |
|-----|----------|---------------------------------|------------------------------------------------------------------------------------------------------------------------------------------------------------------------------------------------------------------------------------------------------------------------------------------------------------------------------------------------------------------------------------------------------------------------------------------------------------------------------------------------------------------------------------------------------------------------------------------------------------------------------------------------------------------------------------------------------------------------------------------------------------------------------------------------------------------------------------------------------------------------------------------------------------------------------------------------------------------------------------------------------------------------------------------------------------------------------------------------------------------------------------------------------|
| 3   |          | Citric acid                     | <p>MS Zoomed Spectrum</p> 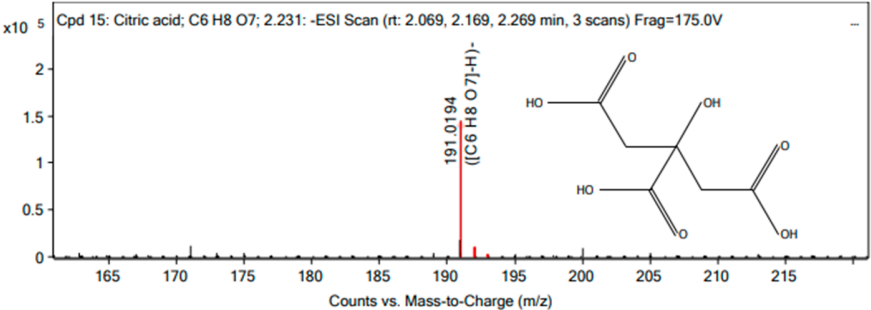 <p>Cpd 15: Citric acid; C6 H8 O7; 2.231: -ESI Scan (rt: 2.069, 2.169, 2.269 min, 3 scans) Frag=175.0V</p> <p>191.0194<br/>[(C6 H8 O7)-H]<sup>-</sup></p> <p>MS/MS Spectrum</p>  <p>Cpd 15: Citric acid; C6 H8 O7; 2.231: (M-H)<sup>-</sup> -ESI Product Ion (rt: 2.135, 2.210, 2.311 min, 3 scans)</p> <p>111.0084<br/>[C5 H3 O3]<sup>-</sup></p> <p>191.0193<br/>[C6 H7 O7]<sup>-</sup></p> <p>MS/MS Spectrum</p>  <p>Cpd 15: Citric acid; C6 H8 O7; 2.231: (M-H)<sup>-</sup> -ESI Product Ion (rt: 2.143, 2.219, 2.319 min, 3 scans)</p> <p>87.0083<br/>[C3 H3 O3]<sup>-</sup></p> <p>MS/MS Spectrum</p>  <p>Cpd 15: Citric acid; C6 H8 O7; 2.231: (M-H)<sup>-</sup> -ESI Product Ion (rt: 2.152, 2.227, 2.327 min, 3 scans)</p> <p>57.0341<br/>[C3 H5 O]<sup>-</sup></p> |



| No. | Polarity | Name of compound identification | Mass spectra                                                                                                                                                                                                                                                                                                                                                                                                                                                                                                                                                                                                                                                                                                                                                                                                                                                              |
|-----|----------|---------------------------------|---------------------------------------------------------------------------------------------------------------------------------------------------------------------------------------------------------------------------------------------------------------------------------------------------------------------------------------------------------------------------------------------------------------------------------------------------------------------------------------------------------------------------------------------------------------------------------------------------------------------------------------------------------------------------------------------------------------------------------------------------------------------------------------------------------------------------------------------------------------------------|
| 4   |          | Epicatechin                     | <p>MS Zoomed Spectrum</p> 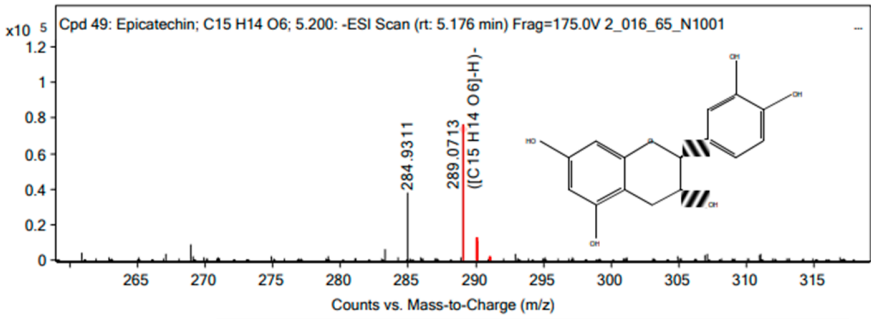 <p>Cpd 49: Epicatechin; C15 H14 O6; 5.200: -ESI Scan (rt: 5.176 min) Frag=175.0V 2_016_65_N1001</p> <p>MS/MS Spectrum</p>  <p>Cpd 49: Epicatechin; C15 H14 O6; 5.200: (M-H)-: -ESI Product Ion (rt: 5.192 min) Frag=185.0V CID</p> <p>MS/MS Spectrum</p>  <p>Cpd 49: Epicatechin; C15 H14 O6; 5.200: (M-H)-: -ESI Product Ion (rt: 5.201 min) Frag=195.0V CID</p> <p>MS/MS Spectrum</p>  <p>Cpd 49: Epicatechin; C15 H14 O6; 5.200: (M-H)-: -ESI Product Ion (rt: 5.209 min) Frag=215.0V CID</p> |

| No. | Polarity | Name of compound identification             | Mass spectra                                                                                                                                                                                                                                                                                                                                                                                                                                                                                                                                                                                                                                                                                                                                                                                                                                                                                                                                                |
|-----|----------|---------------------------------------------|-------------------------------------------------------------------------------------------------------------------------------------------------------------------------------------------------------------------------------------------------------------------------------------------------------------------------------------------------------------------------------------------------------------------------------------------------------------------------------------------------------------------------------------------------------------------------------------------------------------------------------------------------------------------------------------------------------------------------------------------------------------------------------------------------------------------------------------------------------------------------------------------------------------------------------------------------------------|
| 5   |          | Methyl N-( $\alpha$ -methylbutyryl) glycine | <p>MS Zoomed Spectrum</p> 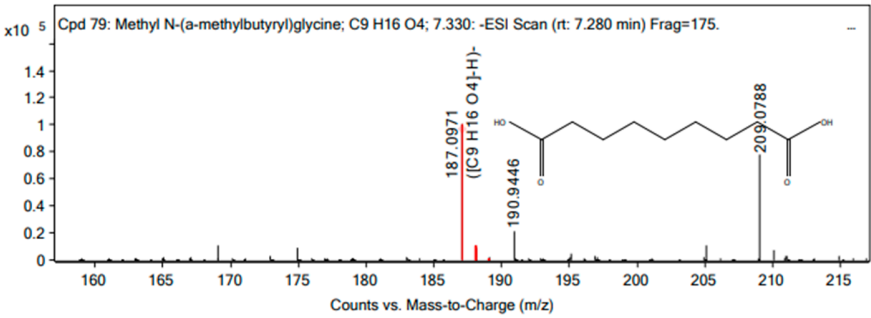 <p>Cpd 79: Methyl N-(<math>\alpha</math>-methylbutyryl)glycine; C9 H16 O4; 7.330: -ESI Scan (rt: 7.280 min) Frag=175.</p> <p>MSMS Spectrum</p>  <p>Cpd 79: Methyl N-(<math>\alpha</math>-methylbutyryl)glycine; C9 H16 O4; 7.330: (M-H)-: -ESI Product Ion (rt: 7.322 m)</p> <p>MSMS Spectrum</p>  <p>Cpd 79: Methyl N-(<math>\alpha</math>-methylbutyryl)glycine; C9 H16 O4; 7.330: (M-H)-: -ESI Product Ion (rt: 7.330 m)</p> <p>MSMS Spectrum</p>  <p>Cpd 79: Methyl N-(<math>\alpha</math>-methylbutyryl)glycine; C9 H16 O4; 7.330: (M-H)-: -ESI Product Ion (rt: 7.338 m)</p> |

| No. | Polarity | Name of compound identification | Mass spectra                                                                                                                                                                                                                                                                                                                                                                                                                                                                                                                                                                                                                                                                                                                                                                                                                                                                                                                                                                                                                                    |
|-----|----------|---------------------------------|-------------------------------------------------------------------------------------------------------------------------------------------------------------------------------------------------------------------------------------------------------------------------------------------------------------------------------------------------------------------------------------------------------------------------------------------------------------------------------------------------------------------------------------------------------------------------------------------------------------------------------------------------------------------------------------------------------------------------------------------------------------------------------------------------------------------------------------------------------------------------------------------------------------------------------------------------------------------------------------------------------------------------------------------------|
| 6   |          | 3-Dehydroshikimic acid          | <p>MS Zoomed Spectrum</p> 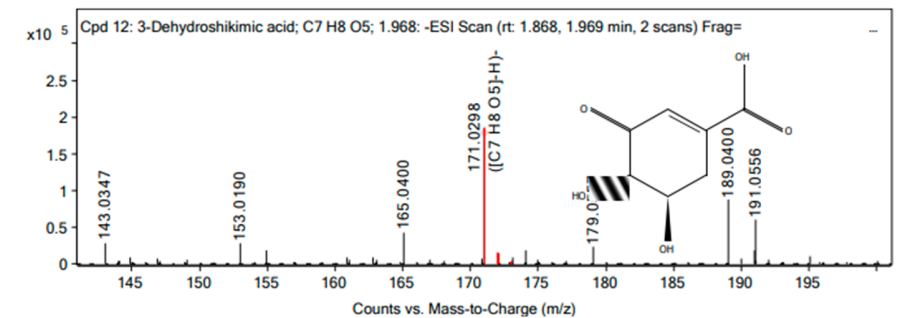 <p>Cpd 12: 3-Dehydroshikimic acid; C7 H8 O5; 1.968: -ESI Scan (rt: 1.868, 1.969 min, 2 scans) Frag=</p> <p>Counts vs. Mass-to-Charge (m/z)</p> <p>MS/MS Spectrum</p>  <p>Cpd 12: 3-Dehydroshikimic acid; C7 H8 O5; 1.968: (M-H)-: -ESI Product Ion (rt: 1.935, 1.985 min, 2</p> <p>Counts vs. Mass-to-Charge (m/z)</p> <p>MS/MS Spectrum</p>  <p>Cpd 12: 3-Dehydroshikimic acid; C7 H8 O5; 1.968: (M-H)-: -ESI Product Ion (rt: 1.943, 1.993 min, 2</p> <p>Counts vs. Mass-to-Charge (m/z)</p> <p>MS/MS Spectrum</p>  <p>Cpd 12: 3-Dehydroshikimic acid; C7 H8 O5; 1.968: (M-H)-: -ESI Product Ion (rt: 1.951, 2.002 min, 2</p> <p>Counts vs. Mass-to-Charge (m/z)</p> |

| No. | Polarity | Name of compound identification | Mass spectra                                                                                                                                                                                                                                                                                                                                                                                                                                                                                                                                                                                                                                                                                                                                                                                                                                                                                                                                                                                                                        |
|-----|----------|---------------------------------|-------------------------------------------------------------------------------------------------------------------------------------------------------------------------------------------------------------------------------------------------------------------------------------------------------------------------------------------------------------------------------------------------------------------------------------------------------------------------------------------------------------------------------------------------------------------------------------------------------------------------------------------------------------------------------------------------------------------------------------------------------------------------------------------------------------------------------------------------------------------------------------------------------------------------------------------------------------------------------------------------------------------------------------|
| 7   |          | 3,4-Dihydroxybenzaldehyde       | <p>MS Zoomed Spectrum</p> <p>Cpd 30: 3,4-Dihydroxybenzaldehyde; C7 H6 O3; 3.797: -ESI Scan (rt: 3.772 min) Frag=175.0V 2_0</p> 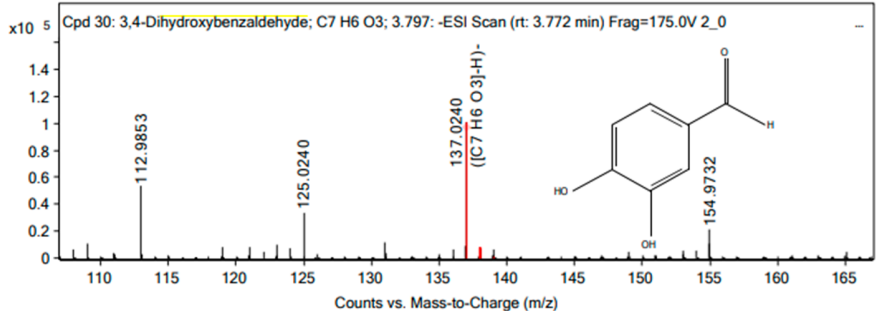 <p>Counts vs. Mass-to-Charge (m/z)</p> <p>MSMS Spectrum</p> <p>Cpd 30: 3,4-Dihydroxybenzaldehyde; C7 H6 O3; 3.797: (M-H)-: -ESI Product Ion (rt: 3.789 min) Fra</p>  <p>Counts vs. Mass-to-Charge (m/z)</p> <p>MSMS Spectrum</p> <p>Cpd 30: 3,4-Dihydroxybenzaldehyde; C7 H6 O3; 3.797: (M-H)-: -ESI Product Ion (rt: 3.797 min) Fra</p>  <p>Counts vs. Mass-to-Charge (m/z)</p> <p>MSMS Spectrum</p> <p>Cpd 30: 3,4-Dihydroxybenzaldehyde; C7 H6 O3; 3.797: (M-H)-: -ESI Product Ion (rt: 3.806 min) Fra</p>  <p>Counts vs. Mass-to-Charge (m/z)</p> |



| No. | Polarity | Name of compound identification | Mass spectra                                                                                                                                                                                                                                                                                                                                                                                                                                                                                                    |
|-----|----------|---------------------------------|-----------------------------------------------------------------------------------------------------------------------------------------------------------------------------------------------------------------------------------------------------------------------------------------------------------------------------------------------------------------------------------------------------------------------------------------------------------------------------------------------------------------|
| 9   |          | Quinic acid                     | <p data-bbox="969 268 1836 571"> 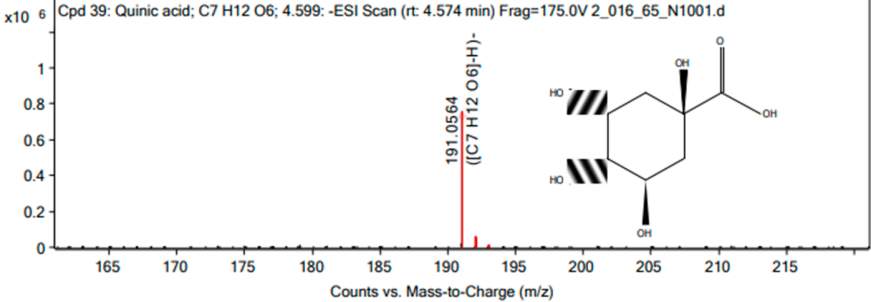 </p> <p data-bbox="1099 576 1711 804">  </p> <p data-bbox="1099 809 1711 1037">  </p> <p data-bbox="1099 1042 1722 1267">  </p> |

| No. | Polarity | Name of compound identification | Mass spectra                                                                                                                                                                                                                                                                                                                                                                                                                                                                                                                                                                                                                                                                                                                                                                                                                                                                                                                                                                                                                                                                                                                                                                                                |
|-----|----------|---------------------------------|-------------------------------------------------------------------------------------------------------------------------------------------------------------------------------------------------------------------------------------------------------------------------------------------------------------------------------------------------------------------------------------------------------------------------------------------------------------------------------------------------------------------------------------------------------------------------------------------------------------------------------------------------------------------------------------------------------------------------------------------------------------------------------------------------------------------------------------------------------------------------------------------------------------------------------------------------------------------------------------------------------------------------------------------------------------------------------------------------------------------------------------------------------------------------------------------------------------|
| 10  |          | D-(+)-3-Phenyllactic acid       | <p>MS Zoomed Spectrum</p> <p>Cpd 69: D-(+)-3-Phenyllactic acid; C<sub>9</sub> H<sub>10</sub> O<sub>3</sub>; 6.754: -ESI Scan (rt: 6.679 min) Frag=175.0V 2_016</p> 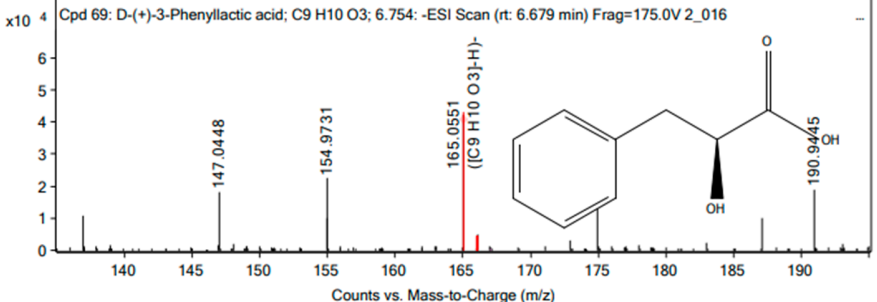 <p>Counts vs. Mass-to-Charge (m/z)</p> <p>MS Spectrum</p> <p>Cpd 69: D-(+)-3-Phenyllactic acid; C<sub>9</sub> H<sub>10</sub> O<sub>3</sub>; 6.754: (M-H)<sup>-</sup> -ESI Product Ion (rt: 6.745 min) Frag=</p>  <p>Counts vs. Mass-to-Charge (m/z)</p> <p>MS Spectrum</p> <p>Cpd 69: D-(+)-3-Phenyllactic acid; C<sub>9</sub> H<sub>10</sub> O<sub>3</sub>; 6.754: (M-H)<sup>-</sup> -ESI Product Ion (rt: 6.754 min) Frag=</p>  <p>Counts vs. Mass-to-Charge (m/z)</p> <p>MS Spectrum</p> <p>Cpd 69: D-(+)-3-Phenyllactic acid; C<sub>9</sub> H<sub>10</sub> O<sub>3</sub>; 6.754: (M-H)<sup>-</sup> -ESI Product Ion (rt: 6.762 min) Frag=</p>  <p>Counts vs. Mass-to-Charge (m/z)</p> |

| No. | Polarity | Name of compound identification | Mass spectra                                                                                                                                                                                                                                                                                                                                                                                                                                                                                                                                                                                                                                                                                                                                                                                                               |
|-----|----------|---------------------------------|----------------------------------------------------------------------------------------------------------------------------------------------------------------------------------------------------------------------------------------------------------------------------------------------------------------------------------------------------------------------------------------------------------------------------------------------------------------------------------------------------------------------------------------------------------------------------------------------------------------------------------------------------------------------------------------------------------------------------------------------------------------------------------------------------------------------------|
| 11  |          | Pyrocatechol                    | <p>MS Zoomed Spectrum</p> 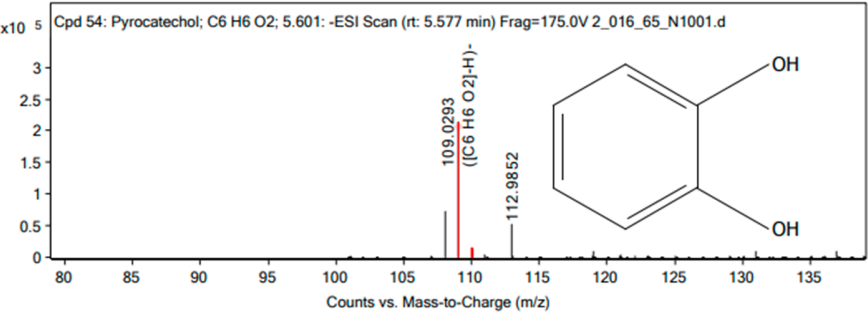 <p>Cpd 54: Pyrocatechol; C6 H6 O2; 5.601: -ESI Scan (rt: 5.577 min) Frag=175.0V 2_016_65_N1001.d</p> <p>MSMS Spectrum</p>  <p>Cpd 54: Pyrocatechol; C6 H6 O2; 5.601: (M-H)-: -ESI Product Ion (rt: 5.593 min) Frag=185.0V CID</p>  <p>Cpd 54: Pyrocatechol; C6 H6 O2; 5.601: (M-H)-: -ESI Product Ion (rt: 5.601 min) Frag=195.0V CID</p>  <p>Cpd 54: Pyrocatechol; C6 H6 O2; 5.601: (M-H)-: -ESI Product Ion (rt: 5.610 min) Frag=215.0V CID</p> |



| No. | Polarity | Name of compound identification | Mass spectra                                                                                                                                                                                                                                                                                                                                                                                                                                                                                                                                                                                                                                                                                                                                                                                                                                                                                                                                                                                                                                              |
|-----|----------|---------------------------------|-----------------------------------------------------------------------------------------------------------------------------------------------------------------------------------------------------------------------------------------------------------------------------------------------------------------------------------------------------------------------------------------------------------------------------------------------------------------------------------------------------------------------------------------------------------------------------------------------------------------------------------------------------------------------------------------------------------------------------------------------------------------------------------------------------------------------------------------------------------------------------------------------------------------------------------------------------------------------------------------------------------------------------------------------------------|
| 12  |          | Nordihydroguaiaretic Acid       | <p>MS/MS Spectrum</p> <p>Cpd 104: Nordihydroguaiaretic Acid; C<sub>18</sub>H<sub>22</sub>O<sub>4</sub>; 9.836: (M-H)<sup>-</sup>: -ESI Product Ion (rt: 9.827 min) Fr</p> 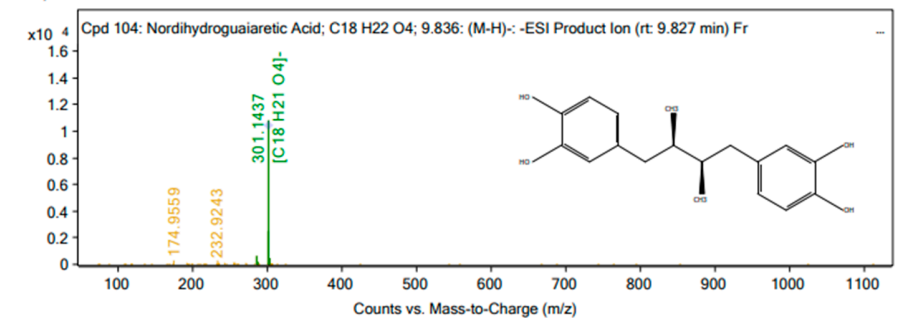 <p>MS/MS Spectrum</p> <p>Cpd 104: Nordihydroguaiaretic Acid; C<sub>18</sub>H<sub>22</sub>O<sub>4</sub>; 9.836: (M-H)<sup>-</sup>: -ESI Product Ion (rt: 9.827 min) Fr</p>  <p>MS/MS Spectrum</p> <p>Cpd 104: Nordihydroguaiaretic Acid; C<sub>18</sub>H<sub>22</sub>O<sub>4</sub>; 9.836: (M-H)<sup>-</sup>: -ESI Product Ion (rt: 9.836 min) Fr</p>  <p>MS/MS Spectrum</p> <p>Cpd 104: Nordihydroguaiaretic Acid; C<sub>18</sub>H<sub>22</sub>O<sub>4</sub>; 9.836: (M-H)<sup>-</sup>: -ESI Product Ion (rt: 9.844 min) Fr</p>  |

| No. | Polarity | Name of compound identification | Mass spectra                                                                                                                                                                                                                                                                                                                                                                                                                                                                                                                                                                                                                                                                                                                                                                                                                                                                                                                                                                                                                       |
|-----|----------|---------------------------------|------------------------------------------------------------------------------------------------------------------------------------------------------------------------------------------------------------------------------------------------------------------------------------------------------------------------------------------------------------------------------------------------------------------------------------------------------------------------------------------------------------------------------------------------------------------------------------------------------------------------------------------------------------------------------------------------------------------------------------------------------------------------------------------------------------------------------------------------------------------------------------------------------------------------------------------------------------------------------------------------------------------------------------|
| 13  |          | D-Ornithine                     | <p>MS Zoomed Spectrum</p> <p>Cpd 10: D-Ornithine; C5 H12 N2 O2; 1.893: -ESI Scan (rt: 1.868 min) Frag=175.0V 2_016_65_N10</p> 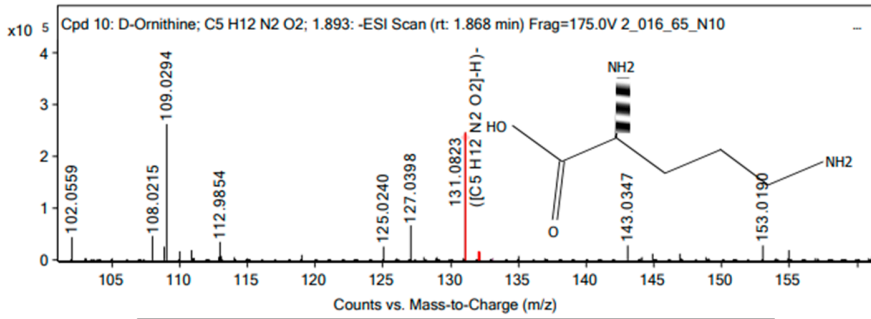 <p>Counts vs. Mass-to-Charge (m/z)</p> <p>MSMS Spectrum</p> <p>Cpd 10: D-Ornithine; C5 H12 N2 O2; 1.893: (M-H)-: -ESI Product Ion (rt: 1.885 min) Frag=185.0V C</p>  <p>Counts vs. Mass-to-Charge (m/z)</p> <p>MSMS Spectrum</p> <p>Cpd 10: D-Ornithine; C5 H12 N2 O2; 1.893: (M-H)-: -ESI Product Ion (rt: 1.893 min) Frag=195.0V C</p>  <p>Counts vs. Mass-to-Charge (m/z)</p> <p>MSMS Spectrum</p> <p>Cpd 10: D-Ornithine; C5 H12 N2 O2; 1.893: (M-H)-: -ESI Product Ion (rt: 1.901 min) Frag=215.0V C</p>  <p>Counts vs. Mass-to-Charge (m/z)</p> |

| No. | Polarity | Name of compound identification | Mass spectra                                                                                                                                                                                                                                                                                                                                                                                                                                                                                                                                                                                                                                                                                                                                                                                                                                                                                                                                                                                                                               |
|-----|----------|---------------------------------|--------------------------------------------------------------------------------------------------------------------------------------------------------------------------------------------------------------------------------------------------------------------------------------------------------------------------------------------------------------------------------------------------------------------------------------------------------------------------------------------------------------------------------------------------------------------------------------------------------------------------------------------------------------------------------------------------------------------------------------------------------------------------------------------------------------------------------------------------------------------------------------------------------------------------------------------------------------------------------------------------------------------------------------------|
| 14  |          | Isopalmitic acid                | <p>MS Zoomed Spectrum</p> 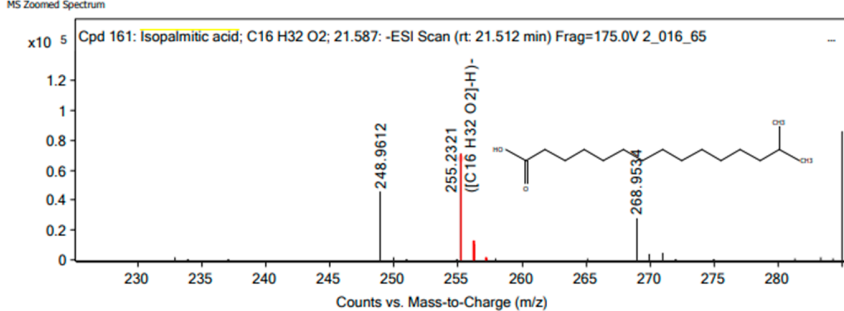 <p>Cpd 161: Isopalmitic acid; C16 H32 O2; 21.587: -ESI Scan (rt: 21.512 min) Frag=175.0V 2_016_65</p> <p>Counts vs. Mass-to-Charge (m/z)</p> <p>MS/MS Spectrum</p>  <p>Cpd 161: Isopalmitic acid; C16 H32 O2; 21.587: (M-H)-: -ESI Product Ion (rt: 21.578 min) Frag=185</p> <p>Counts vs. Mass-to-Charge (m/z)</p> <p>MS/MS Spectrum</p>  <p>Cpd 161: Isopalmitic acid; C16 H32 O2; 21.587: (M-H)-: -ESI Product Ion (rt: 21.587 min) Frag=195</p> <p>Counts vs. Mass-to-Charge (m/z)</p> <p>MS/MS Spectrum</p>  <p>Cpd 161: Isopalmitic acid; C16 H32 O2; 21.587: (M-H)-: -ESI Product Ion (rt: 21.595 min) Frag=215</p> <p>Counts vs. Mass-to-Charge (m/z)</p> |
